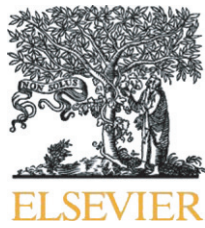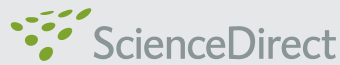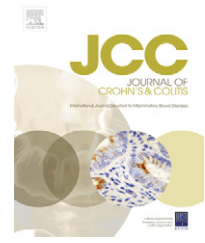

REVIEW ARTICLE

# Hepatosplenic T-cell lymphoma and inflammatory bowel disease

Anne Thai <sup>a,\*</sup>, Thomas Prindiville <sup>b,1</sup>

<sup>a</sup> University of California, Davis Medical Center (UCDMC), Internal Medicine, 4150 V Street, Suite 3100, Sacramento, CA 95817, United States

<sup>b</sup> University of California, Davis Medical Center (UCDMC), Gastroenterology and Hepatology, 4150 V Street, Suite 3500, Sacramento, CA 95817, United States

Received 28 January 2010; received in revised form 19 May 2010; accepted 19 May 2010

## KEYWORDS

Hepatosplenic T-cell lymphoma;  
Lymphoma;  
Infliximab;  
6-Mercaptopurine;  
Inflammatory bowel disease

## Abstract

**Objective:** This article reviews the current literature and knowledge about hepatosplenic T-cell lymphoma (HSTCL), providing an overview of the clinical features, a description of its pathology and immunophenotypic traits in relation to other lymphomas. In addition, we explore the history of reported cases of hepatosplenic T-cell lymphoma in relation to the possible existence of a causal relationship between infliximab use and HSTCL. The treatments for HSTCL will be briefly addressed.

**Methods:** A comprehensive literature search using multiple databases was performed. Keyword search phrases including "lymphoma," "hepatosplenic T-cell lymphoma," "Inflammatory bowel disease," "6-mercaptopurine," and "infliximab" were used in various combinations. In addition references from published papers were reviewed as well.

**Results:** There are over 200 reported cases of HSTCL. Only 22 cases of hepatosplenic T-cell lymphoma are associated with IBD treatment. Clinicians usually reserve immunomodulators and biologics for moderate to severe IBD cases. The ultimate goal of therapy is to control inflammation and therefore allow mucosal healing. IBD patients demonstrating mucosal healing are less likely to undergo surgery and experience complications related to their disease. We manipulate the immune system with corticosteroids, immunomodulators, and biologics, therefore causing bone marrow suppression. With bone marrow suppression, malignant degeneration may begin through selective uncontrolled cell proliferation, initiating HSTCL development in the genetically susceptible.

**Conclusion:** Hepatosplenic T-cell lymphoma is a rare disease, often with a poor outcome. With the increasing number of reported cases of HSTCL linked to the use of infliximab, adalimumab, and AZA/6-MP, there appears to be an undeniable association of HSTCL development with the use of these agents. This risk is unquantifiable. When considering the rarity of cases and the multiple complications with uncontrolled disease, however, the benefit of treatment far outweighs the risk.

© 2010 European Crohn's and Colitis Organisation. Published by Elsevier B.V. All rights reserved.

\* Corresponding author. Tel.: +1 650 270 7117, +1 916 762 1966 (Pager); fax: +1 916 734 7080.

E-mail addresses: [anne.thai@ucdmc.ucdavis.edu](mailto:anne.thai@ucdmc.ucdavis.edu) (A. Thai), [thomas.prindiville@ucdmc.ucdavis.edu](mailto:thomas.prindiville@ucdmc.ucdavis.edu) (T. Prindiville).

<sup>1</sup> Tel.: +1 916 734 7183; fax: +1 916 734 7908.

## Contents

|                                           |     |
|-------------------------------------------|-----|
| 1. Introduction . . . . .                 | 512 |
| 2. Clinical presentation . . . . .        | 513 |
| 3. Pathology . . . . .                    | 513 |
| 4. Immunophenotypic traits . . . . .      | 513 |
| 5. Treatment of HSTCL . . . . .           | 514 |
| 6. HSTCL and IBD treatment . . . . .      | 514 |
| 7. IBD treatment strategies . . . . .     | 515 |
| 8. Conclusion . . . . .                   | 517 |
| Conflicts of interest statement . . . . . | 518 |
| Acknowledgements . . . . .                | 518 |
| References . . . . .                      | 518 |

## 1. Introduction

For the last decade, hepatosplenic T-cell lymphoma (HSTCL) was a relatively unknown disease. In fact, although it was in 1981 that Kadin and colleagues first recognized it as a distinct entity from other peripheral T-cell lymphomas, the medical world did not quite catch on to the significance of what HSTCL entails.<sup>1</sup> With the tantalizing hope of control and of relief for patients suffering from inflammatory bowel disease (IBD) with immunomodulating and biological agents, the rare disease of HSTCL began to gain worldwide recognition. There are studies that suggest an increased malignancy and lymphoma risk in patients with IBD.<sup>2–4</sup> But perhaps, a more specific question would be whether lymphoma, including HSTCL, displays a higher incidence in IBD patients who received immunomodulating agents and/or biological agents. If so, are clinicians putting their IBD patients at increased risk for HSTCL with the use of these medications?

Between the years 2001 and 2005, 70,214 new cases of non-Hodgkin's lymphoma (NHL) were diagnosed. In the general population, the incidence of NHL is 17.2 per 100,000 individuals per year. Non-Hodgkin's lymphoma is usually a diagnosis of the older population, with a peak in the 6th to 7th decade. The incidence of extranodal NHL is 5.0 per 100,000.<sup>5</sup> In the National Cancer Institute's Surveillance, Epidemiology, and End Results (SEER) Database, there are a total of 34 reported cases between 1973 and 2005 of HSTCL, a subtype of extranodal NHL. This equates to an incidence of only 0.046 per 100,000 individuals or 1 case per 1088 patient years. Among the 34 cases, 24 were men, and 10 were women. The age breakdown is as follows: 4 patients were less than the age of 19, 6 patients were in their 20s, 12 patients were in their 30s, 5 patients in their 40s, 2 patients in their 50s, and 5 patients older than 60 years old.<sup>5</sup>

Hepatosplenic T-cell lymphoma is a rare and aggressive extranodal form of non-Hodgkin's lymphoma that affects predominantly men. In addition to hepatosplenic involvement as its name suggests, HSTCL is also characterized by a lack of lymphadenopathy, the presence of cytopenias, and sinusoidal infiltration of the splenic red pulp, liver, and bone marrow.<sup>6–8</sup> HSTCL has a rapidly progressive course. The mean time of diagnosis to death is less than 16 months.<sup>8–10</sup> Since Farcet et al. proposed HSTCL as a separate entity from other peripheral T-cell lymphomas, there has been approximately 238 cases of HSTCL reported worldwide through literature search.<sup>7,8,10–102</sup>

Among the medical community, especially the pediatricians, there is a growing concern that HSTCL is an emerging disease of the young, especially of pediatric patients treated with biologic agents. This fear may not be warranted. Of all the reported cases (not including the SEER Database), only 25 cases of hepatosplenic T-cell lymphoma are associated with IBD treatment. An overwhelming 73% of HSTCL were de novo. The de novo group includes patients that were explicitly stated as healthy, which entails lack of autoimmune diseases, treatment with immunosuppressants, history of transplant, or any other primary malignancies. Characteristics of patients who developed HSTCL de novo, including mean age, sex prevalence, presentation, histopathology, and prognosis did not differ from the patients with some degree of immunosuppression.<sup>10,16,17,20</sup> The second largest incidence (18%) is found in immunocompromised patients. This group consists of patients with renal and heart transplant, chronic steroid use, systemic lupus erythematosus, recurrent malarial infections, sickle cell anemia, dermatomyositis, autoimmune hepatitis, and primary malignancies such as Hodgkin's lymphoma, acute myelogenous leukemia, and multiple myeloma. The third largest group of HSTCL (10%) was found in IBD patients exposed to treatment with immunomodulators and/or biologics (Fig. 1).

Other inflammatory and autoimmune diseases such as peripheral and axial arthritis, Sjogren's disease, polymyositis, systemic sclerosis, dermatitis herpetiformis associated with celiac disease, psoriasis, Hashimoto's thyroiditis have not been linked to the development of HSTCL. But these diseases have all been shown to have a higher risk of developing non-Hodgkin's lymphoma compared to the general population.<sup>103</sup>

The lack of association with HSTCL in these inflammatory diseases may be explained by the fact that B lymphocytes, not gamma-delta T cells, play a predominant role in immunity in the periphery and joint space. The chronic inflammation may be a factor in precipitating the malignant degeneration of the B cells involved. Some studies suggest a 100-fold risk with developing diffuse large B-cell lymphoma in individuals with the highest rheumatoid arthritis disease severity when compared to patients with low global disease activity.<sup>103</sup> Sjogren's disease, systemic lupus erythematosus, and celiac disease are also associated with large B-cell lymphoma development.<sup>103</sup> The specific associations with each specific inflammatory disease have been reviewed elsewhere.<sup>103</sup>

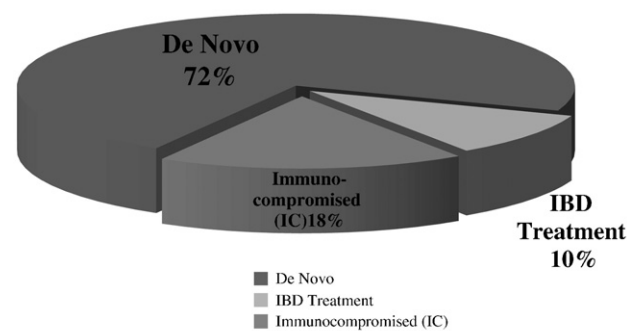

Figure 1 Distribution of HSTCL cases.

2. Clinical presentation

HSTCL affects predominantly adult men, with a median age of 35 years, with an age range of 8 months to 68 years.<sup>8,10,23</sup> Patients typically present with splenomegaly (96%), hepatomegaly (77%), systemic B-type symptoms (high fevers, night sweats, and weight loss) (70%), bone marrow involvement (72%), and thrombocytopenia (89%).<sup>8,10,16</sup> Even in patients who have undergone a splenectomy, the severity of thrombocytopenia increases with disease progression. Other common presenting signs include concomitant anemia or leukopenia with thrombocytopenia, elevated lactate dehydrogenase (LDH), elevated liver enzymes, and symptoms of hepatitis.<sup>8,13,104</sup> Atypical findings include lymphocytosis, peripheral blood infiltration by tumor cells, and simultaneous involvement of other organs (Table 1).<sup>105</sup>

3. Pathology

A majority of reported cases of HSTCL are of the gamma–delta T-cell receptor subtype. Case reports of the alpha–beta subtype have been described as well. The alpha–beta subtype of HSTCL demonstrates a predominance in women, but is very similar to the gamma–delta subtype in clinical presentation, pathology, and cytogenetics.<sup>9,17</sup> It is consid-

ered a subvariant of HSTCL according to the World Health Organization (WHO) classification of lymphomas.<sup>9,10</sup>

T cells are vital to the proper function of cell-mediated immunity. Specifically, gamma–delta T cells are a population of T cells comprising 5% of the adult T-cell population that are important to mucosal immunity. Gamma–delta T cells display an affinity for the epithelial layer of the intestines, skin, and red pulp of the spleen.<sup>106,107</sup> A knockout mice study involving  $\gamma\delta$  T cells, confirm the immunoregulatory role of  $\gamma\delta$  T cells at the intestinal epithelium.<sup>108</sup> Furthermore, Nanno et al. suggest that  $\gamma\delta$  T cells are the key for proinflammation in colitis. In the  $\gamma\delta$  T-cell knockout mice group, less severe colitis, a reduction in the production of proinflammatory proteins, and a decrease of neutrophilic infiltration, were observed.<sup>108</sup>

Like other peripheral T-cell lymphomas, HSTCL may demonstrate erythrophagocytosis.<sup>1,9</sup> Erythrophagocytosis by reactive tumor cells have been reported rarely.<sup>9,10,81</sup> Pathological features include a significantly enlarged spleen, with global infiltration of the splenic red pulp with atypical lymphocytes.<sup>16</sup> In the liver, there is a sinusoidal distribution of tumor cells that may be accompanied by periportal and portal invasion.<sup>8,105</sup> The involved bone marrow is hypercellular, and may include plasmacytosis and blood vessel malformation.<sup>105</sup> However, bone marrow infiltration is often subtle and requires specific immunohistochemical staining for T-cell antigens.<sup>105,109</sup> Tumor cells are homogeneous and usually intermediate in size, but cells can vary in size with each respective case. The bone marrow infiltration pattern changes with disease progression, favoring an interstitial spread over the characteristic sinusoidal pattern, and tumor cells transform into larger cells, resembling blasts.<sup>105,109</sup>

4. Immunophenotypic traits

Cytometric immunophenotyping plays a central role in confirming the diagnosis of HSTCL. Immunophenotyping has been reviewed in detail.<sup>9,10,16,109</sup> In contrast to the mucosal and cutaneous gamma–delta T-cell lymphomas, hepatosplenic T-cell lymphoma consists of atypical lymphocytes that are cytotoxically inactive.<sup>6,16,109</sup> This is exemplified by neoplastic cells staining positive for T-cell restricted intracellular antigen (TIA-1), and negative for granzyme B and perforin (proteins released by cytotoxic T cells).<sup>16,109</sup> The most common immunophenotype of HSTCL is listed in Table 2. In order to differentiate between the gamma–delta and alpha–beta T-cell receptor (TCR) chains, monoclonal antibodies specific to each chain are used.<sup>10</sup> With other non-hepatosplenic gamma–delta T-cell lymphomas, there is a strong association with Epstein-Barr virus (EBV).<sup>110</sup> Interestingly, the presence of EBV infection in tumor cells of HSTCL patients, detected by in situ hybridization for EBV- encoded small RNA (EBER), is extremely atypical and therefore rarely seen.<sup>9,10,15,18,84</sup>

Cytogenetic analysis reveals the abnormality isochromosome 7q to be present consistently in all atypical lymphoid cells of HSTCL.<sup>86,97,109</sup> There have been recent reports of ring chromosome 7, a clonal aberration of 7q, in HSTCL patients.<sup>25,47</sup> Both chromosomal abnormalities lead to an amplification of the long arm of Chromosome 7 therefore the amplification of oncogenes, and varying degrees of 7p deletion, the location of

Table 1 Clinical presentation (symptoms, laboratory findings).

|                         | % Patients with involvement |
|-------------------------|-----------------------------|
| <i>Symptoms</i>         |                             |
| Splenomegaly            | 97                          |
| Hepatomegaly            | 78                          |
| Systemic B symptoms     | 70                          |
| Lymphadenopathy         | Approximately 0             |
| <i>Lab findings</i>     |                             |
| Bone marrow involvement | 73                          |
| Thrombocytopenia        | 90                          |
| Anemia                  | 85                          |
| Leukopenia              | 72                          |
| Elevated LDH            | 60                          |
| Elevated liver enzymes  | 46                          |

**Table 2** Most common immunophenotypic traits.

|                                | Positive (+)/negative (–) |
|--------------------------------|---------------------------|
| Cytolytic granule proteins     |                           |
| TIA-1                          | +                         |
| Granzyme B                     | –                         |
| Perforin                       | –                         |
| Natural killer cell associated |                           |
| CD16                           | +/-                       |
| CD56                           | +                         |
| CD57                           | –                         |
| T cell associated              |                           |
| CD2                            | +                         |
| CD3                            | +                         |
| CD4                            | –                         |
| CD5                            | –                         |
| CD7                            | +/-                       |
| CD8                            | –                         |
| CD16                           | +/-                       |
| CD25                           | –                         |
| CD30                           | –                         |
| CD38                           | +                         |
| Epstein-Barr virus             | –                         |

tumor suppressor genes.<sup>69</sup> Other defects include trisomy 8 and loss of the Y chromosome.<sup>10,86,91,97</sup>

## 5. Treatment of HSTCL

Hepatosplenic T-cell lymphoma is a rapidly progression disease with a mean survival of less than 16 months, regardless of the treatment modality. Multiple treatment modalities have been used, including cyclophosphamide, doxorubicin, vincristine and prednisone (CHOP), CHOP-like therapies, interferon alpha therapy, splenectomy, platinum based chemotherapy, and allogeneic or autologous bone marrow or stem cell transplantation. None are curative and rarely is complete remission accomplished and sustained.<sup>7,8,10</sup> Individual case reports on HSTCL treatment seem promising. Jaeger and colleagues recently documented complete remission in a HSTCL patient with Rituximab with CHOP, followed by a combination of alemtuzumab and cladribine for a total of 27 months.<sup>29</sup> Rituximab selectively binds to CD20, a marker for both malignant and normal B cells. In the patient mentioned above, the immunophenotypic trait included being CD20 positive.<sup>29</sup> This example serves to emphasize that HSTCL's immunophenotype may vary from patient to patient. Therefore it may be beneficial to tailor treatment to each individual case according to immunophenotypic traits.

## 6. HSTCL and IBD treatment

Immunosuppression with corticosteroids, cyclosporine, infliximab, adalimumab, azathioprine, and 6-mercaptopurine have been associated with HSTCL.<sup>10,13,14,32,111</sup> In addition, many HSTCL cases are linked to alterations or deficits in the immune system exemplified by cases in severe immunodeficiency disorders, multiple recurrent malarial infections,

and pregnancy.<sup>21,23,24</sup> There is an obvious association between immunosuppression and the development of HSTCL. By manipulating the immune response of IBD patients with medications, there may be an increased chance of developing HSTCL.

The efficacy of corticosteroids and thiopurine therapy with azathioprine and 6-mercaptopurine in IBD has been well established. But there are risks that come with using these medications. One major concern is the increased incidence of lymphoma. A meta-analysis performed by Kandiel and colleagues suggests that the risk of lymphoma in IBD patients treated with AZA or 6-MP is four times the risk of the general population.<sup>112</sup> However, a confounding factor to the study may include the severity of the disease in relation to the population of IBD patients who actually receive immunomodulating treatment. Preliminary results from a French cohort study involving 20,802 IBD patients suggest an increased risk for development of lymphoma especially with AZA use.<sup>113</sup> Disanti et al. performed a study that examined the lymphoma incidence in IBD patients with 6-MP induced sustained leukopenia. Their findings indicate that patients on 6-MP treatment that developed sustained leukopenia, defined as leukocyte count of less than or equal to 4000 for a total of  $\geq 20$  days, had a statistically significant higher incidence of lymphoma (7%) even after confounding factors were accounted for.<sup>114</sup> The exact cause of this leukopenia leaves room for discussion. It is unlikely that the sustained leukopenia is a result of overdosing. The observed leukopenia is likely the result of the unmasking of a preleukemic state already present in the host's bone marrow.

Early studies suggest that 6-MP and thioguanine metabolites cause immunosuppression and cytotoxicity by inhibiting purine synthesis through direct binding to guanine triphosphate. However, Tiede and colleagues propose that the mechanism of action is through the inhibition of Ras-related C3 botulinum toxin substrate 1a (Rac1), a GTP-binding protein.<sup>115</sup> They demonstrate that the 6-MP metabolite, 6-thioguanine triphosphate binds to Rac1 directly. Even at low concentrations of AZA, Rac1 inhibition along with costimulation of CD28 leads to apoptosis.<sup>115</sup> 6-thioguanine nucleotide (6-TGN) levels closely correlate with therapeutic efficacy and myelotoxicity.<sup>116</sup> Approximately 5% of patients treated with AZA or 6-MP may not develop apoptosis, and are considered drug failures and possibly have a phosphorylation defect.

Immunomodulator use is usually reserved for moderate to severe disease. Clinicians generally utilize a milligram per kilogram approach or a dosage regimen tailored through monitoring 6-MP metabolites. Most clinicians traditionally start at low doses and slowly titrate up the administered dosage according complete blood counts, closely monitoring for myelotoxicity and adverse reactions.

Pharmacogenomic studies of thiopurine metabolism reveal a metabolite range from 230 to 400 for optimal therapeutic benefit.<sup>116</sup> In theory, if the magnitude of 6 TG binding to nucleotides is important for oncogenesis then traditional dosing at milligram per kilograms (mg/kg) and observing for leukopenia may expose the patient to more risk.

Accomplishing the desired therapeutic response, while protecting the patient's safety, may prove to be difficult. Given the narrow therapeutic index balanced with the

pharmacokinetic variability determined by genetics, it may be safer to individualize, and therefore optimize therapy according to TPMT genotyping and metabolite levels.<sup>116,117</sup> The genotype profiles and recommendations for metabolite level monitoring have been reviewed in detail elsewhere.<sup>116</sup>

Multiple studies, such as the ACCENT trials and ACT trials, demonstrated infliximab to be beneficial in controlling active mucosal inflammation and in maintaining remission in IBD.<sup>118–120</sup> There is conflicting evidence for the association of infliximab use and increased risk for lymphoma. When Wolfe and colleagues performed a study including 18,572 patients with rheumatoid arthritis, a causal relationship between infliximab use and development of lymphoma could not be established.<sup>121</sup> In a multicenter-matched study, Biancone and colleagues revealed that there is no data supportive of a causal relationship between infliximab use and development of malignancy.<sup>122</sup> Only nine out of 404 patients treated with infliximab developed cancer, including 3 cases of breast adenocarcinoma, 1 laryngeal carcinoma, 1 basal cell carcinoma, 1 cholangiocarcinoma, 2 cases of rectal carcinoma, and 1 case of leukemia. The incidence of malignancy was comparable to the control group that had 7 cases of malignancy out of 404 patients.<sup>122</sup> A meta-analysis of anti-TNF therapy in patients with rheumatoid arthritis (RA) which included nine randomized control trials, suggested an increased risk of malignancy with anti-TNF therapy that was dose dependent.<sup>123</sup> The majority of the patients developed malignancy early during treatment, with 19/34 patients diagnosed with new malignancy within 20 weeks of starting treatment. This suggests that a number of these newly diagnosed malignancies may represent preexisting cancers. This study also contradicts findings from a Swedish population based study which concluded that there was no increased risk of solid malignancies in patients treated with anti-TNF therapy with RA compared to other RA patients.<sup>124</sup>

Of note, there have been a total of 19 cases of HSTCL linked to infliximab use and 4 cases linked to the use of adalimumab (Table 3).<sup>111</sup> Of the 19 infliximab cases, only 4 cases involved patients  $\leq 18$  years old. Along with exposure to biologics, each patient received either AZA, 6-MP, or prednisone at some point during their respective treatment course. There are 6 reported cases of HSTCL in patients who had no prior exposure to biologics, (3 cases with AZA, sulfasalazine and/or prednisone, 1 case with AZA monotherapy, 1 case with AZA and unknown IBD therapy, 1 case with 6-MP exposure).<sup>16,19,22,125,126</sup> As mentioned previously there could be many factors playing into the development of HSTCL in IBD patients treated with biological agents. It appears that factors including severity of IBD in patients who ultimately receive biologic therapy, the possibility of dose-related effect, the differences in each patient's innate immune response and therefore varying degrees of immunosuppression accomplished by biologics, may singularly or collectively contribute to HSTCL development. Perhaps, a synergistic or catalytic effect of dual therapy with immunomodulators and biological agents propels a malignant degeneration and thus the development of HSTCL.

If one decides to incorporate biologics and immunomodulating therapy, the risk of inducing HSTCL is there. How should clinicians approach IBD patients in relation to treatment with immunomodulators, anti-TNF therapy, or a combination of both? There is a clear benefit to treating IBD

patients with immunomodulators and anti-TNF therapy to control disease progression. Lewis and colleagues demonstrated an increased quality-adjusted life expectancy, measured by the Crohn's Disease Activity Index (CDAI), in Crohn's patients using azathioprine to maintain disease remission.<sup>127</sup> Although there have been case reports of patients developing HSTCL after being treated with immunomodulating and biological agents, it is still relatively rare.

Recent preliminary results from the Study of Biologic and Immunomodulator Naïve Patients In Crohn's Disease (SONIC) trial, give tangible hope to controlling inflammatory bowel disease with both immunomodulators and biologics.<sup>128</sup> IBD patients treated with both AZA and infliximab demonstrated an overwhelming response with 56.8% maintaining corticosteroid-free clinical remission at Week 26. More significantly, at 26 weeks a large proportion of patients on dual therapy displayed mucosal healing.<sup>128</sup> The presence of mucosal healing signifies a significant decrease in active inflammation and successful regeneration of normal mucosa.<sup>129</sup> Mucosal healing is a favorable prognostic indicator of disease activity. IBD patients demonstrating mucosal healing are less likely to undergo surgery and experience complications related to their disease.<sup>130,131</sup> More long-term studies need to be done in order to further determine if there is a causal relationship with biologics and HSTCL.

Delineating the exact mechanisms for malignant degeneration is important for understanding the observed link between IBD and HSTCL. It is well known that chemicals, medications, viruses, radiation, and rapid cell turnover initiate neoplastic transformation. A disruption in the cell cycle check points either through alterations in tumor suppressor genes and proto-oncogenes, or the DNA sequence itself, changes cell signal transduction. Patients with IBD experience chronically active inflammation, initiating constant cell regeneration and rapid turnover. Treatment with immunomodulators and biologics may be the epigenetic factor that allows selective uncontrolled cell proliferation and therefore initiate HSTCL development in the genetically susceptible. But why is HSTCL so rapidly progressive? It could be that a latent viral infection had the opportunity to permanently alter the RNA/DNA sequence previously. The immunosuppressing agents could be the jump start needed to complete the process. Continued research in this area may lead to the answer, as the exact mechanisms remain unknown.

When formulating an IBD treatment plan, factors to consider in each patient's case include the severity of patient's disease, history of intolerable side effects from specific agents, history of failure of specific therapy, and the patient's decision after knowing the benefits and reported risks of each class of drugs.<sup>132–134</sup>

## 7. IBD treatment strategies

The third largest group of patients with HSTCL was found in IBD patients exposed to treatment with immunomodulators and/or biologics. This makes up only 10% of all reported cases. Regardless of the rarity of these cases, the increased risk of HSTCL development is present. This risk further complicates the clinical management of patients with moderate to severe inflammatory bowel disease, especially

**Table 3** Cases of HSTCL associated with IBD treatment.

| Therapy exposure  |         |        |                                                                 |                                                       |                                                 |                                          |
|-------------------|---------|--------|-----------------------------------------------------------------|-------------------------------------------------------|-------------------------------------------------|------------------------------------------|
| Case #/reference  | Age/sex | IBD Dx | HSTCL subtype                                                   | A AZA/6-MP                                            | Infliximab and AZA/6-MP                         | Other Tx                                 |
| 1 <sup>16</sup>   | ?       | UC     | – $\gamma/\delta$                                               | AZA 17 yrs                                            |                                                 | ?                                        |
| 2 <sup>22</sup>   | 35 M    | CD     | – $\gamma/\delta$ , Isochromosome 7q, Trisomy 8                 | AZA 5.6 yrs                                           |                                                 | – Sulfasalazine<br>– Steroid for 10 yrs  |
| 3 <sup>19</sup>   | 18 M    | CD     | – $\gamma/\delta$                                               | AZA 6 yrs                                             |                                                 | ?                                        |
| 4 <sup>126</sup>  | ?       | CD     | Unknown                                                         | AZA 4 yrs                                             |                                                 | – Prednisone<br>– IV Cyclosporine        |
| 5 <sup>11</sup>   | 30s M   | CD     | – $\gamma/\delta$                                               | 6-MP                                                  |                                                 |                                          |
| 6 <sup>125</sup>  | 15 M    | UC     | Unknown                                                         | AZA 9 yrs                                             |                                                 | – Sulfasalazine<br>– Prednisone          |
| 7 <sup>13</sup>   | 17 F    | CD     | – $\alpha/\beta$                                                |                                                       | 6-MP 4.5 yrs<br>Infliximab: 20 doses of 5 mg/kg | – Prednisone<br>– Mesalamine             |
| 8 <sup>135</sup>  | 31 M    | CD     | – $\gamma/\delta$ , Isochromosome 7q                            | 6-MP 5 yrs<br>Infliximab: 3 doses of 300 mg           |                                                 | – Mesalamine<br>– Prednisone             |
| 9 <sup>111</sup>  | 19 M    | CD     | – $\gamma/\delta$                                               | AZA 7 yrs<br>Infliximab: 3 doses of 300 mg/kg         |                                                 | None                                     |
| 10 <sup>111</sup> | 18 M    | CD     | – $\gamma/\delta$ , Isochromosome 7q                            | AZA 5 yrs, 6-MP<br>Infliximab: 5 doses of 5 mg/kg     |                                                 | – Prednisone, budesonide                 |
| 11 <sup>111</sup> | 19 M    | CD     | – $\alpha/\beta$                                                | AZA 6 yrs, 6-MP<br>Infliximab: 14 doses of 550–600 mg |                                                 | – Mesalamine<br>– Prednisone             |
| 12 <sup>111</sup> | 12 M    | CD     | – $\gamma/\delta$ , Isochromosome 7q                            | AZA 4 yrs, 6-MP<br>Infliximab: 21 doses of 300 mg     |                                                 | – Mesalamine                             |
| 13 <sup>111</sup> | 15 M    | CD     | – $\gamma/\delta$ , Isochromosome 7q                            | AZA 2.5 yrs<br>Infliximab: 13 doses of 150–200 mg     |                                                 | – Mesalamine<br>– Prednisone             |
| 14 <sup>111</sup> | 31 M    | CD     | – $\gamma/\delta$                                               | 6-MP 3 yrs<br>Infliximab: 1 dose of 5 mg/kg           |                                                 | – Mesalamine<br>– Prednisone<br>– MTX    |
| 15 <sup>111</sup> | 22 M    | CD     | – $\alpha/\beta$ , Trisomy 13                                   | 6-MP 4 yrs<br>Infliximab: 24 doses of 5 mg/kg         |                                                 | – Mesalamine, Basalazide<br>– Prednisone |
| 16 <sup>111</sup> | 22 M    | IC     | – $\gamma/\delta$                                               | AZA 5 yrs<br>Infliximab: 1 dose of 5 mg/kg            |                                                 | – Mesalamine<br>– Steroids               |
| 17 <sup>111</sup> | 31 M    | CD     | – $\alpha/\beta$ , Trisomy 8, loss of chromosome y, 7p deletion | AZA 5 yrs<br>Infliximab: 3 doses of 5 mg/kg           |                                                 | – Sulfasalazine<br>– Prednisolone        |
| 18 <sup>111</sup> | 40 M    | CD     | – $\gamma/\delta$                                               | AZA 7 yrs<br>Infliximab: 3 doses of 5 mg/kg           |                                                 | – Prednisone                             |
| 19 <sup>111</sup> | 21 M    | UC     | Unknown                                                         | 6-MP 7 yrs<br>Infliximab: ? doses of 5 mg/kg          |                                                 | – Mesalamine<br>– Adalimumab             |
| 20 <sup>111</sup> | 19 M    | CD     | Unknown, Isochromosome 7q                                       | 6-MP<br>Infliximab: 18 doses of 5–10 mg/kg            |                                                 | – Mesalamine<br>– Prednisone             |
| 21 <sup>111</sup> | 29 M    | CD     | – $\gamma/\delta$                                               | AZA 11 yrs<br>Infliximab: 3 doses of 400 mg           |                                                 | – Adalimumab                             |
| 22 <sup>111</sup> | 58 M    | CD     | Unknown                                                         | –AZA, unknown duration<br>–NO infliximab history      |                                                 | – Adalimumab                             |

CD, Crohn's disease; UC, ulcerative colitis; IC, indeterminate colitis; Dx, diagnosis; yrs, years.

in the pediatric population. The current clinical opinion is that there is an increased risk of HSTCL development associated with the use of immunomodulators and biologic agents. However, the good news is approximately one million patients have received this medication over time and throughout that time interval, a progressive increase in HSTCL has not been observed. When the first cases of HSTCL associated with immunomodulator use were reported, most

pediatricians immediately stopped using 6-MP, and implemented infliximab monotherapy. In the survey conducted by Cucchiara et al. for the European Society for Pediatric Gastroenterology, Hepatology, and Nutrition (ESPGHAN), 97% of pediatric patients with Crohn's Disease were treated with immunomodulators and infliximab before the year of 2007. This number significantly dropped when case reports revealed Crohn's patients on combined immunomodulator

and infliximab therapy may have an increased risk of developing HSTCL. Among the clinicians surveyed, only one third of the pediatricians were still using thiopurines. Most changed their management to include either monotherapy with infliximab, or combined therapy with methotrexate and infliximab.<sup>136</sup> Pediatricians at our institution are starting to use 6-MP with infliximab again.

An important question, without a clear guideline established on objective data, remains. What is the best approach in utilizing immunomodulators and biologics that would guarantee optimal patient outcomes? There are multiple treatment algorithms available in regards to the treatment of moderate to severe IBD. The plan of treatment often reflects philosophical differences depending on the institution one trained in or practices in. More importantly, an individual physician's treatment goals or end points, whether it be symptomatic control and/or mucosal healing, prevention of immunogenicity, or increasing the therapeutic response to biologic therapy, often dictate the treatment plan. Treatment strategies include monotherapy with biologics or immunomodulators, the use of immunomodulators in concomitant therapy or in bridging therapy, and early aggressive therapy with both agents (the "top-down approach"). There is clinical evidence that support and challenge the methods listed above.

The use of immunomodulators and corticosteroids represent the traditional approach before the introduction of biologics. The disadvantage of this approach evolved around the effects of corticosteroids. However, the most recent SONIC trial reveals that a small percentage of patients will respond with immunomodulator therapy with modest mucosal healing.<sup>128</sup> This category of therapy in this study provides a reference point to compare various treatment strategies in terms of response and mucosal healing.

Results from a multi-center randomized control trial, suggest that monotherapy with infliximab was just as effective in controlling disease, as measured by mucosal healing and clinical scores (Crohn's Disease Activity Index [CDAI] and Inflammatory Bowel Diseases Questionnaire [IBDQ]), as was concomitant therapy with immunosuppressives and infliximab.<sup>137</sup> However, Van Assche et al., also discovered that patients on monotherapy had lower infliximab trough levels, corresponding to higher C-reactive protein levels and higher clinical scores. In addition, it appears that over time, patients on monotherapy developed immunogenicity, as indicated by the increase in patients requiring adjustments to dosing schedules, the development of intolerance, and the loss of response.<sup>137</sup> If the treatment goal is to effectively inhibit immunogenicity, then concomitant therapy with immunomodulators may be the answer. Concomitant therapy inhibits the formation of antibodies to infliximab (ATIs), resulting in higher infliximab trough levels and therefore an improved therapeutic response.<sup>128,138–140</sup>

Bridging therapy or induction of clinical remission with infliximab followed by maintenance with immunomodulators alone, has advantages. A two year open-label randomized control trial in Belgium compared the effectiveness of bridging therapy with the conventional treatment regimen, which included sequential addition of corticosteroids, azathioprine, and infliximab.<sup>141</sup> All 133 Crohn's patients were naïve to treatment with steroids, immunosuppressing agents (methotrexate or azathioprine), and biologic agents.

This study proved that bridging therapy was superior to the conventional "step-up" therapy. Sixty percent of patients who received early combined therapy with 3 infusions of infliximab with azathioprine, who were then maintained on azathioprine alone, demonstrated clinical remission at 26 and 52 weeks. This significant level of remission is in contrast to 35.9% and 42.2% of the patients who were randomized to conventional therapy, at 26 and 52 weeks respectively. In addition they found that patients who were bridged to immunosuppressive therapy, had a significant rapid reduction in C-reactive protein levels by week 10, as well as more ulcer free patients (73.1%) at week 104.<sup>141</sup> Further investigations on bridging therapy are of interest, as there is a concern of the cost effectiveness of the use of biological agents.

Early aggressive therapy is supported by multiple studies. The SONIC trial makes a strong argument for the benefits of concomitant therapy and early aggressive therapy in Crohn's disease.<sup>128</sup> Early aggressive therapy with infliximab and azathioprine maintained corticosteroid-free clinical remission and resulted in the best mucosal healing.<sup>128</sup> Most data on the use of early aggressive therapy in inflammatory disease processes can be found in large randomized prospective rheumatoid arthritis trials. There are multiple randomized control trials involving the concomitant use of anti-TNF inhibitors with immunomodulators compared to monotherapy that demonstrate an enhanced clinical response with greater improvements in functionality and quality of life, as well as prevention of the progression of joint destruction or erosions.<sup>142–148</sup> A recent study performed by Emery et al. found that combination therapy with golimumab and methotrexate in methotrexate and anti-TNF naïve patients, was more efficacious than monotherapy with either methotrexate or adalimumab, in achieving better clinical response rates.<sup>148</sup>

The best control of immunogenicity was with oral methotrexate and remicade in the initial RA trial with a resultant 8%.<sup>149</sup> Additionally, the immunogenicity was very low with concomitant therapy in the SONIC trial of 0.9%.<sup>128</sup> HSTCL has not been reported with the use of methotrexate. However, oral methotrexate therapy has not been proven to work with Crohn's disease. The incidence of immunogenicity with sporadic therapy was 30% in the 54 week Crohn's disease trial.<sup>119</sup>

Early aggressive therapy in RA altered the natural history of the disease. This change is easier to demonstrate in RA compared to CD secondary to scoring systems and objective measurements of disease progression, i.e. joint destruction. Bridging therapy and early aggressive therapy in CD suggests that these therapies may change the natural history of this disease. Multi-center randomized trials will be needed to further define the evolving philosophical approaches and end points for therapy.

## 8. Conclusion

Hepatosplenic T-cell lymphoma is a rare disease, often with a poor outcome. With the increasing number of reported cases of HSTCL linked to the use of infliximab, adalimumab, and AZA/6-MP, there appears to be an undeniable association of HSTCL development with the use of these agents. But

unfortunately, this risk is not quantifiable. But with its presence, both patients and clinicians may need to think twice about controlling IBD with these agents. When considering the rarity of cases and the multiple complications with uncontrolled disease, however, the benefit of treatment far outweighs the risk. A more prudent approach to the treatment and management of IBD patients, may just be to stick to the fundamentals of the practice of medicine: combine clinical experience, established evidence based guidelines, and meticulous consideration into each individual patient's case.

## Conflicts of interest statement

We have not published or submitted any similar or related studies. No conflicts of interest exist.

## Acknowledgements

There was no grant support, study sponsors, or other assistance for this project. No conflicts of interest exist. No writing assistance was provided for this manuscript.

AT participated in the study concept and design, acquisition of data, analysis and interpretation of data, drafting of the manuscript, critical revision of the manuscript for important intellectual content, and statistical analysis. PT conceived of the study, and was involved in the critical revision of the manuscript for important intellectual content and statistical analysis. All authors read and approved the final manuscript.

## References

- Kadin ME, Kamoun M, Lamberg J. Erythrophagocytic T gamma lymphoma: a clinicopathologic entity resembling malignant histiocytosis. *N Engl J Med* 1981;**304**:648–53.
- Bernstein CN, Blanchard JF, Kliever E, et al. Cancer risk in patients with inflammatory bowel disease: a population-based study. *Cancer* 2001;**91**:854–62.
- Greenstein AJ, Mullin GE, Strauchen JA, et al. Lymphoma in inflammatory bowel disease. *Cancer* 1992;**69**:1119–23.
- Arseneau KO, Stukenborg GJ, Connors Jr AF, et al. The incidence of lymphoid and myeloid malignancies among hospitalized Crohn's disease patients. *Inflamm Bowel Dis* 2001;**7**:106–12.
- Bethesda MD Surveillance Epidemiology and End Results (SEER) Database. National Cancer Institute <<http://seer.cancer.gov> 1975–2004/>.
- Gaulard P, Bourquelot P, Kanavaros P, et al. Expression of the alpha/beta and gamma/delta T-cell receptors in 57 cases of peripheral T-cell lymphomas. Identification of a subset of gamma/delta T-cell lymphomas. *Am J Pathol* 1990;**137**:617–28.
- Farcet JP, Gaulard P, Marolleau JP, et al. Hepatosplenic T-cell lymphoma: sinusoidal localization of malignant cells expressing the T-cell receptor gamma delta. *Blood* 1990;**75**:2213–9.
- Weidmann E. Hepatosplenic T cell lymphoma. A review on 45 cases since the first report describing the disease as a distinct lymphoma entity in 1990. *Leukemia* 2000;**14**:991–7.
- Macon WR, Levy NB, Kurtin PJ, et al. Hepatosplenic alphabeta T-cell lymphomas: A report of 14 cases and comparison with hepatosplenic gammadelta T-cell lymphomas. *Am J Surg Pathol* 2001;**25**:285–96.
- Belhadj K, Reyes F, Farcet JP, et al. Hepatosplenic gamma-delta T-cell lymphoma is a rare clinicopathologic entity with poor outcome: report on a series of 21 patients. *Blood* 2003;**102**:4261–9.
- Mackey AC, Green L, Liang LC, et al. Hepatosplenic T cell lymphoma associated with infliximab use in young patients treated for inflammatory bowel disease. *J Pediatr Gastroenterol Nutr* 2007;**44**:265–7.
- Macon WR, Williams ME, Greer JP, et al. Natural killer-like T-cell lymphomas: aggressive lymphomas of T-large granular lymphocytes. *Blood* 1996;**87**:1474–83.
- Thayu M, Markowitz JE, Mamula P, et al. Hepatosplenic T-cell lymphoma in an adolescent patient after immunomodulator and biologic therapy for Crohn disease. *J Pediatr Gastroenterol Nutr* 2005;**40**:220–2.
- Humphreys MR, Cino M, Quirt I, et al. Long-term survival in two patients with hepatosplenic T cell lymphoma treated with interferon-alpha. *Leuk Lymphoma* 2008;**49**:1420–3.
- Ohshima K, Haraoka S, Harada N, et al. Hepatosplenic gammadelta T-cell lymphoma: relation to Epstein-Barr virus and activated cytotoxic molecules. *Histopathology* 2000;**36**:127–35.
- Vega F, Medeiros LJ, Gaulard P. Hepatosplenic and other gamma-delta T-cell lymphomas. *Am J Clin Pathol* 2007;**127**:869–80.
- Lai R, Larratt LM, Etches W, et al. Hepatosplenic T-cell lymphoma of alphabeta lineage in a 16-year-old boy presenting with hemolytic anemia and thrombocytopenia. *Am J Surg Pathol* 2000;**24**:459–63.
- Taguchi A, Miyazaki M, Sakuragi S, et al. Gamma/delta T cell lymphoma. *Intern Med* 2004;**43**:120–5.
- Mittal S, Milner BJ, Johnston PW, et al. A case of hepatosplenic gamma-delta T-cell lymphoma with a transient response to fludarabine and alemtuzumab. *Eur J Haematol* 2006;**76**:531–4.
- Rossbach HC, Chamizo W, Dumont DP, et al. Hepatosplenic gamma/delta T-cell lymphoma with isochromosome 7q, translocation t(7;21), and tetrasomy 8 in a 9-year-old girl. *J Pediatr Hematol Oncol* 2002;**24**:154–7.
- Hassan R, Franco SA, Stefanoff CG, et al. Hepatosplenic gammadelta T-cell lymphoma following seven malaria infections. *Pathol Int* 2006;**56**:668–73.
- Navarro JT, Ribera JM, Mate JL, et al. Hepatosplenic T-gammadelta lymphoma in a patient with Crohn's disease treated with azathioprine. *Leuk Lymphoma* 2003;**44**:531–3.
- Koga SY, Kumaki S, Ichinohasama R, et al. The first infant case with hepatosplenic gammadelta T-cell lymphoma after acute disseminated encephalomyelitis (ADEM)-like exacerbation. *J Pediatr Hematol Oncol* 2006;**28**:741–5.
- Niitsu N, Kohri M, Togano T, et al. Development of hepatosplenic gammadelta T-cell lymphoma with pancytopenia during early pregnancy: a case report and review of the literature. *Eur J Haematol* 2004;**73**:367–71.
- Tamaska J, Adam E, Kozma A, et al. Hepatosplenic gamma-delta T-cell lymphoma with ring chromosome 7, an isochromosome 7q equivalent clonal chromosomal aberration. *Virchows Arch* 2006;**449**:479–83.
- Lo Nigro L, Munda S, Poli A, et al. Managing hepatosplenic gammadelta T-cell leukemia-lymphoma in children. *Pediatr Blood Cancer* 2007;**49**:763.
- Moleti ML, Testi AM, Giona F, et al. Gamma-delta hepatosplenic T-cell lymphoma. Description of a case with immunophenotypic and molecular follow-up successfully treated with chemotherapy alone. *Leuk Lymphoma* 2006;**47**:333–6.
- Dommm JA, Thompson M, Kuttlesch JF, et al. Allogeneic bone marrow transplantation for chemotherapy-refractory hepatosplenic gammadelta T-cell lymphoma: case report and review of the literature. *J Pediatr Hematol Oncol* 2005;**27**:607–10.

29. Jaeger G, Bauer F, Brezinschek R, et al. Hepatosplenic gammadelta T-cell lymphoma successfully treated with a combination of alemtuzumab and cladribine. *Ann Oncol* 2008;**19**:1025–6.
30. Gao XN, Tang SQ, Liu Y, et al. Hepatosplenic gammadelta T cell lymphoma and its relationship with Epstein-Barr virus infection. *Zhongguo Shi Yan Xue Ye Xue Za Zhi* 2006;**14**:1134–7.
31. Gassas A, Kirby M, Weitzman S, et al. Hepatosplenic gamma-delta T-cell lymphoma in a 10-year-old boy successfully treated with hematopoietic stem cell transplantation. *Am J Hematol* 2004;**75**:113–4.
32. Tey SK, Marlton PV, Hawley CM, et al. Post-transplant hepatosplenic T-cell lymphoma successfully treated with hyperCVAD regimen. *Am J Hematol* 2007.
33. Gonzalez de la Aleja J, Gimenez-Mesa E, Posada IJ, et al. Progressive multifocal leukoencephalopathy in a patient with hepatosplenic T cell lymphoma. *Eur Neurol* 2006;**55**:44–5.
34. Perfetto F, Tarquini R, Mancuso F, et al. Hepato-splenic lymphoma: a rare entity mimicking acute hepatitis: a case report. *World J Gastroenterol* 2003;**9**:1381–4.
35. Ozaki S, Ogasahara K, Kosaka M, et al. Hepatosplenic gamma delta T-cell lymphoma associated with hepatitis B virus infection. *J Med Invest* 1998;**44**:215–7.
36. Meulenbeld HJ, Spiering W, Nooijen P, et al. Hepatosplenic gammadelta T-cell lymphoma: a case report. *Eur J Intern Med* 2007;**18**:241–3.
37. Zhang S, Nong L, Ren YL, et al. Clinicopathologic study of hepatosplenic T-cell lymphoma. *Beijing Da Xue Xue Bao* 2008;**40**:387–91.
38. Li Z, Liu WP, Tang Y, et al. Splenic T-cell and NK-cell lymphomas: a clinicopathologic and immunophenotypic analysis of 9 cases. *Zhonghua Xue Ye Xue Za Zhi* 2007;**28**:217–22.
39. Chen JH, Chan DC, Lee HS, et al. Spontaneous splenic rupture associated with hepatosplenic gammadelta T-cell lymphoma. *J Formos Med Assoc* 2005;**104**:593–6.
40. Geng J, Zhu MG, Ding YQ, et al. Hepatosplenic gammadelta T-cell lymphoma: a clinicopathological study. *Di Yi Jun Yi Da Xue Xue Bao* 2004;**24**:88–90.
41. Otrrock ZK, Hatoum HA, Salem ZM, et al. Long-term remission in a patient with hepatosplenic gammadelta T cell lymphoma treated with bortezomib and high-dose CHOP-like chemotherapy followed by autologous peripheral stem cell transplantation. *Ann Hematol* 2008;**87**:1023–4.
42. Jain D, Sharma MC, Sarkar C, et al. Pituitary gland involvement by a gamma delta hepatosplenic lymphoma, a mimicker of pituitary adenoma: report of a rare case. *J Neurooncol* 2008;**88**:237–41.
43. Chandesris MO, Cretel-Durand E, Jean R, et al. Dermatomyositis associated with hepatosplenic gamma delta T-cell lymphoma. *Rev Méd Interne* 2007;**28**:552–5.
44. Konuma T, Ooi J, Takahashi S, et al. Allogeneic stem cell transplantation for hepatosplenic gammadelta T-cell lymphoma. *Leuk Lymphoma* 2007;**48**:630–2.
45. Machino T, Okoshi Y, Kaneko S, et al. Hepatosplenic alphabeta T-cell lymphoma successfully treated with allogeneic bone marrow transplantation. *Bone Marrow Transplant* 2007;**39**:513–4.
46. Kalac M, Ostojic S, Gasparov S, et al. Microcellular lung carcinoma in patient with hepatosplenic T-cell lymphoma: a case report. *Lijec Vjesn* 2006;**128**:76–8.
47. Shetty S, Mansoor A, Roland B. Ring chromosome 7 with amplification of 7q sequences in a pediatric case of hepatosplenic T-cell lymphoma. *Cancer Genet Cytogenet* 2006;**167**:161–3.
48. Prochazka V, Papajik T, Jarosova M, et al. T-cell gamma/delta hepatosplenic lymphoma – prolonged remission induced by aggressive first line treatment. *Biomed Pap Med Fac Univ Palacky Olomouc Czech Repub* 2005;**149**:275–6.
49. Takaku T, Miyazawa K, Sashida G, et al. Hepatosplenic alphabeta T-cell lymphoma with myelodysplastic syndrome. *Int J Hematol* 2005;**82**:143–7.
50. Wang FX, Zhang XJ, Dong ZR. A case of hepatosplenic gammadelta T cell lymphoma. *Zhongguo Shi Yan Xue Ye Xue Za Zhi* 2005;**13**:505–8.
51. Wei SZ, Liu TH, Wang DT, et al. Hepatosplenic gammadelta T-cell lymphoma. *World J Gastroenterol* 2005;**11**:3729–34.
52. Mansour MR, Dogan A, Morris EC, et al. Allogeneic transplantation for hepatosplenic alphabeta T-cell lymphoma. *Bone Marrow Transplant* 2005;**35**:931–4.
53. Corazzelli G, Capobianco G, Russo F, et al. Pentostatin (2'-deoxycoformycin) for the treatment of hepatosplenic gamma-delta T-cell lymphomas. *Haematologica* 2005;**90**:ECR14.
54. Aldinucci D, Poletto D, Zagonel V, et al. In vitro and in vivo effects of 2'-deoxycoformycin (Pentostatin) on tumour cells from human gammadelta + T-cell malignancies. *Br J Haematol* 2000;**110**:188–96.
55. Grigg AP. 2'-Deoxycoformycin for hepatosplenic gammadelta T-cell lymphoma. *Leuk Lymphoma* 2001;**42**:797–9.
56. Iannitto E, Barbera V, Quintini G, et al. Hepatosplenic gammadelta T-cell lymphoma: complete response induced by treatment with pentostatin. *Br J Haematol* 2002;**117**:995–6.
57. Munir J, Preston G, Polish R. Case report: a common presentation of a rare disease-hepatosplenic T-cell lymphoma. *Hawaii Med J* 2004;**63**:341–3.
58. Chanan-Khan A, Islam T, Alam A, et al. Long-term survival with allogeneic stem cell transplant and donor lymphocyte infusion following salvage therapy with anti-CD52 monoclonal antibody (Campath) in a patient with alpha/beta hepatosplenic T-cell non-Hodgkin's lymphoma. *Leuk Lymphoma* 2004;**45**:1673–5.
59. Chin M, Mugishima H, Takamura M, et al. Hemophagocytic syndrome and hepatosplenic gammadelta T-cell lymphoma with isochromosome 7q and 8 trisomy. *J Pediatr Hematol Oncol* 2004;**26**:375–8.
60. Eom DW, Huh JR, Kang YK, et al. Clinicopathological features of eight Korean cases of primary hepatic lymphoma. *Pathol Int* 2004;**54**:830–6.
61. Petersen-Benz C, Hoffmann N, Beckurts T, et al. Fulminant liver failure induced by hepatosplenic alphabeta T-cell lymphoma. *Z Gastroenterol* 2003;**41**:1083–6.
62. Sadahira Y, Notohara K, Manabe T. Hepatosplenic T cell lymphoma with no expression of cytotoxic molecules. *J Clin Pathol* 2003;**56**:631–3.
63. Gopcsa L, Banyai A, Tamaska J, et al. Hepatosplenic gamma delta T-cell lymphoma with leukemic phase successfully treated with 2-chlorodeoxyadenosine. *Haematologia (Budap)* 2002;**32**:519–27.
64. Shahab N, Kissenger RL, Malhotra V, et al. Hematologic malignancies with extramedullary spread of disease. Case 2. Hepatosplenic T-cell lymphoma. *J Clin Oncol* 2003;**21**:1889–90.
65. Dong J, Chong YY, Meyerson HJ. Hepatosplenic alpha beta T-cell lymphoma: a report of an S100-positive case. *Arch Pathol Lab Med* 2003;**127**:e119–22.
66. Costes V, Duchayne E, Taib J, et al. Intrasinusoidal bone marrow infiltration: a common growth pattern for different lymphoma subtypes. *Br J Haematol* 2002;**119**:916–22.
67. Steurer M, Stauder R, Grunewald K, et al. Hepatosplenic gammadelta-T-cell lymphoma with leukemic course after renal transplantation. *Hum Pathol* 2002;**33**:253–8.
68. Motta G, Vianello F, Menin C, et al. Hepatosplenic gammadelta T-cell lymphoma presenting with immune-mediated thrombocytopenia and hemolytic anemia (Evans' syndrome). *Am J Hematol* 2002;**69**:272–6.
69. Wlodarska I, Martin-Garcia N, Achten R, et al. Fluorescence in situ hybridization study of chromosome 7 aberrations in hepatosplenic T-cell lymphoma: Isochromosome 7q as a

- common abnormality accumulating in forms with features of cytologic progression. *Genes Chromosom Cancer* 2002;33:243–51.
70. Ooi J, Iseki T, Adachi D, et al. Successful allogeneic bone marrow transplantation for hepatosplenic gammadelta T cell lymphoma. *Haematologica* 2001;86:E25.
  71. Khan WA, Yu L, Eisenbrey AB, et al. Hepatosplenic gamma/delta T-cell lymphoma in immunocompromised patients. Report of two cases and review of literature. *Am J Clin Pathol* 2001;116:41–50.
  72. Allory Y, Challine D, Haioun C, et al. Bone marrow involvement in lymphomas with hemophagocytic syndrome at presentation: a clinicopathologic study of 11 patients in a Western institution. *Am J Surg Pathol* 2001;25:865–74.
  73. Kumar S, Lawlor C, Jaffe ES. Hepatosplenic T-cell lymphoma of alphabeta lineage. *Am J Surg Pathol* 2001;25:970–1.
  74. Przybylski GK, Wu H, Macon WR, et al. Hepatosplenic and subcutaneous panniculitis-like gamma/delta T cell lymphomas are derived from different Vdelta subsets of gamma/delta T lymphocytes. *J Mol Diagn* 2000;2:11–9.
  75. Plank L, Fricova M, Stecova N, et al. Primary hepatosplenic (gamma delta) T-cell lymphoma: clinico-pathologic analysis of 3 cases. *Vnitr Léč* 1998;44:528–34.
  76. Wu H, Wasik MA, Przybylski G, et al. Hepatosplenic gamma-delta T-cell lymphoma as a late-onset posttransplant lymphoproliferative disorder in renal transplant recipients. *Am J Clin Pathol* 2000;113:487–96.
  77. Roncella S, Cutrona G, Truini M, et al. Late Epstein-Barr virus infection of a hepatosplenic gamma delta T-cell lymphoma arising in a kidney transplant recipient. *Haematologica* 2000;85:256–62.
  78. Coventry S, Punnett HH, Tomczak EZ, et al. Consistency of isochromosome 7q and trisomy 8 in hepatosplenic gammadelta T-cell lymphoma: detection by fluorescence in situ hybridization of a splenic touch-preparation from a pediatric patient. *Pediatr Dev Pathol* 1999;2:478–83.
  79. Yamaguchi M, Ohno T, Nakamine H, et al. Gamma delta T-cell lymphoma: a clinicopathologic study of 6 cases including extrahepatosplenic type. *Int J Hematol* 1999;69:186–95.
  80. Dincal G, Nalcaci M, Yavuz AS, et al. Case of hepatosplenic gammadelta T-cell lymphoma presenting with severe hypersplenism. *Am J Hematol* 1999;60:313–4.
  81. Nosari A, Oreste PL, Biondi A, et al. Hepato-splenic gamma-delta T-cell lymphoma: a rare entity mimicking the hemophagocytic syndrome. *Am J Hematol* 1999;60:61–5.
  82. Lopez-Guillermo A, Cid J, Salar A, et al. Peripheral T-cell lymphomas: initial features, natural history, and prognostic factors in a series of 174 patients diagnosed according to the R. E.A.L. Classification. *Ann Oncol* 1998;9:849–55.
  83. Boulland ML, Kanavaros P, Wechsler J, et al. Cytotoxic protein expression in natural killer cell lymphomas and in alpha beta and gamma delta peripheral T-cell lymphomas. *J Pathol* 1997;183:432–9.
  84. Kraus MD, Crawford DF, Kaleem Z, et al. T gamma/delta hepatosplenic lymphoma in a heart transplant patient after an Epstein-Barr virus positive lymphoproliferative disorder: a case report. *Cancer* 1998;82:983–92.
  85. Sohn SK, Ahn T, Kim DH, et al. Hepatosplenic T-cell lymphoma: polymorphocytic transformation 18 months after splenectomy. *Int J Hematol* 1997;66:227–32.
  86. Alonsozana EL, Stamberg J, Kumar D, et al. Isochromosome 7q: the primary cytogenetic abnormality in hepatosplenic gammadelta T cell lymphoma. *Leukemia* 1997;11:1367–72.
  87. Francois A, Lesesve JF, Stamatoullas A, et al. Hepatosplenic gamma/delta T-cell lymphoma: a report of two cases in immunocompromised patients, associated with isochromosome 7q. *Am J Surg Pathol* 1997;21:781–90.
  88. Chan JK. Splenic involvement by peripheral T-cell and NK-cell neoplasms. *Semin Diagn Pathol* 2003;20:105–20.
  89. Salhany KE, Feldman M, Kahn MJ, et al. Hepatosplenic gammadelta T-cell lymphoma: ultrastructural, immunophenotypic, and functional evidence for cytotoxic T lymphocyte differentiation. *Hum Pathol* 1997;28:674–85.
  90. Kakkar N, Banerjee AK, Marwaha N, et al. Hepatosplenic T-cell lymphoma: sinusoidal localization of malignant T-cells—a case report. *Am J Hematol* 1996;53:278–9.
  91. Jonveaux P, Daniel MT, Martel V, et al. Isochromosome 7q and trisomy 8 are consistent primary, non-random chromosomal abnormalities associated with hepatosplenic T gamma/delta lymphoma. *Leukemia* 1996;10:1453–5.
  92. Yao M, Tien HF, Lin MT, et al. Clinical and hematological characteristics of hepatosplenic T gamma/delta lymphoma with isochromosome for long arm of chromosome 7. *Leuk Lymphoma* 1996;22:495–500.
  93. Lei KI, Chow JH, Johnson PJ. Aggressive primary hepatic lymphoma in Chinese patients. Presentation, pathologic features, and outcome. *Cancer* 1995;76:1336–43.
  94. Garcia-Sanchez F, Menarguez J, Cristobal E, et al. Hepatosplenic gamma-delta T-cell malignant lymphoma: report of the first case in childhood, including molecular minimal residual disease follow-up. *Br J Haematol* 1995;90:943–6.
  95. Wong KF, Chan JK, Matutes E, et al. Hepatosplenic gamma delta T-cell lymphoma. A distinctive aggressive lymphoma type. *Am J Surg Pathol* 1995;19:718–26.
  96. Labouyrie E, Morel D, Boiron JM, et al. Peripheral T-cell lymphoma in a chronically immunosuppressed renal transplant patient. *Mod Pathol* 1995;8:355–9.
  97. Wang CC, Tien HF, Lin MT, et al. Consistent presence of isochromosome 7q in hepatosplenic T gamma/delta lymphoma: a new cytogenetic-clinicopathologic entity. *Genes Chromosom Cancer* 1995;12:161–4.
  98. Dommann-Scherrer CC, Kurer SB, Zimmermann DR, et al. Occult hepatosplenic T-gamma delta lymphoma. Value of genotypic analysis in the differential diagnosis. *Virchows Arch* 1995;426:629–34.
  99. Ross CW, Schnitzer B, Sheldon S, et al. Gamma/delta T-cell posttransplantation lymphoproliferative disorder primarily in the spleen. *Am J Clin Pathol* 1994;102:310–5.
  100. Tsang WY, Chan JK, Yip TT, et al. In situ localization of Epstein-Barr virus encoded RNA in non-nasal/nasopharyngeal CD56-positive and CD56-negative T-cell lymphomas. *Hum Pathol* 1994;25:758–65.
  101. Mastovich S, Ratech H, Ware RE, et al. Hepatosplenic T-cell lymphoma: an unusual case of a gamma delta T-cell lymphoma with a blast-like terminal transformation. *Hum Pathol* 1994;25:102–8.
  102. Ohno T, Komada F, Yamaguchi M, et al. Gamma/delta T-cell lymphoma with hepatosplenomegaly: report of a case. *Int J Hematol* 1993;57:269–76.
  103. Smedby KE, Baecklund E, Askling J. Malignant lymphomas in autoimmunity and inflammation: a review of risks, risk factors, and lymphoma characteristics. *Cancer Epidemiol Biomark Prev* 2006;15:2069–77.
  104. Harris AC, Kornstein MJ. Malignant lymphoma imitating hepatitis. *Cancer* 1993;71:2639–46.
  105. Vega F, Medeiros LJ, Bueso-Ramos C, et al. Hepatosplenic gamma/delta T-cell lymphoma in bone marrow. A sinusoidal neoplasm with blastic cytologic features. *Am J Clin Pathol* 2001;116:410–9.
  106. Bucy RP, Chen CL, Cooper MD. Tissue localization and CD8 accessory molecule expression of T gamma delta cells in humans. *J Immunol* 1989;142:3045–9.
  107. Parker CM, Groh V, Band H, et al. Evidence for extrathymic changes in the T cell receptor gamma/delta repertoire. *J Exp Med* 1990;171:1597–612.

108. Nanno M, Kanari Y, Naito T, et al. Exacerbating role of gammadelta T cells in chronic colitis of T-cell receptor alpha mutant mice. *Gastroenterology* 2008;**134**:481–90.
109. Cooke CB, Krenacs L, Stetler-Stevenson M, et al. Hepatosplenic T-cell lymphoma: a distinct clinicopathologic entity of cytotoxic gamma delta T-cell origin. *Blood* 1996;**88**:4265–74.
110. Arnulf B, Copie-Bergman C, Delfau-Larue MH, et al. Nonhepatosplenic gammadelta T-cell lymphoma: a subset of cytotoxic lymphomas with mucosal or skin localization. *Blood* 1998;**91**:1723–31.
111. Horsham, PA. Remicade (infliximab): hepatosplenic T-cell Lymphoma; March 2010 Nov–Dec.
112. Kandiel A, Fraser AG, Korelitz BI, et al. Increased risk of lymphoma among inflammatory bowel disease patients treated with azathioprine and 6-mercaptopurine. *Gut* 2005;**54**:1121–5.
113. Beaugerie L, Carrat F, Bouvier A, Brousse N, Carbonnel F, Colombel J, et al. Excessive Risk of Lymphoproliferative Disorders (LPD) in Inflammatory Bowel Disease (IBD): interim results of the cesame cohort. (Abstract). *Gastroenterology* 2008;**134**:A116–7.
114. Disanti W, Rajapakse RO, Korelitz BI, et al. Incidence of neoplasms in patients who develop sustained leukopenia during or after treatment with 6-mercaptopurine for inflammatory bowel disease. *Clin Gastroenterol Hepatol* 2006;**4**:1025–9.
115. Tiede I, Fritz G, Strand S, et al. CD28-dependent Rac1 activation is the molecular target of azathioprine in primary human CD4+ T lymphocytes. *J Clin Invest* 2003;**111**:1133–45.
116. Dubinsky MC, Lamothe S, Yang HY, et al. Pharmacogenomics and metabolite measurement for 6-mercaptopurine therapy in inflammatory bowel disease. *Gastroenterology* 2000;**118**:705–13.
117. Seidman EG. Clinical use and practical application of TPMT enzyme and 6-mercaptopurine metabolite monitoring in IBD. *Rev Gastroenterol Disord* 2003;**3**(Suppl 1):S30–8.
118. Rutgeerts P, Sandborn WJ, Feagan BG, et al. Infliximab for induction and maintenance therapy for ulcerative colitis. *N Engl J Med* 2005;**353**:2462–76.
119. Hanauer SB, Feagan BG, Lichtenstein GR, et al. Maintenance infliximab for Crohn's disease: the ACCENT I randomised trial. *Lancet* 2002;**359**:1541–9.
120. Kornbluth A, Sachar DB. Ulcerative colitis practice guidelines in adults (update): American College of Gastroenterology, Practice Parameters Committee. *Am J Gastroenterol* 2004;**99**:1371–85.
121. Wolfe F, Michaud K. Lymphoma in rheumatoid arthritis: the effect of methotrexate and anti-tumor necrosis factor therapy in 18, 572 patients. *Arthritis Rheum* 2004;**50**:1740–51.
122. Biancone L, Orlando A, Kohn A, et al. Infliximab and newly diagnosed neoplasia in Crohn's disease: a multicentre matched pair study. *Gut* 2006;**55**:228–33.
123. Bongartz T, Sutton AJ, Sweeting MJ, et al. Anti-TNF antibody therapy in rheumatoid arthritis and the risk of serious infections and malignancies: systematic review and meta-analysis of rare harmful effects in randomized controlled trials. *JAMA* 2006;**295**:2275–85.
124. Asklung J, Forde CM, Brandt L, et al. Risks of solid cancers in patients with rheumatoid arthritis and after treatment with tumour necrosis factor antagonists. *Ann Rheum Dis* 2005;**64**:1421–6.
125. Keller KM, Magdefrau C, Bohl J, et al. Hepatosplenic T-cell lymphoma in a 15-year-old boy with ulcerative colitis treated with azathioprine for 9 years. *J Pediatr Gastroenterol Nutr* 2007;**44**:e259.
126. Lemann M, Gerald de La Valussiere F, Bouhnik M, et al. Intravenous cyclosporine for refractory attacks of Crohn's disease (CD): long-term follow-up of patients [abstract]. *Gastroenterology* 1998;**114**:A1020.
127. Lewis JD, Schwartz JS, Lichtenstein GR. Azathioprine for maintenance of remission in Crohn's disease: benefits outweigh the risk of lymphoma. *Gastroenterology* 2000;**118**:1018–24.
128. Colombel JF, Sandborn WJ, Reinisch W, et al. Infliximab, azathioprine, or combination therapy for Crohn's disease. *N Engl J Med*;362:1383–95.
129. Okamoto R, Watanabe M. Cellular and molecular mechanisms of the epithelial repair in IBD. *Dig Dis Sci* 2005;**50**(Suppl 1):S34–8.
130. Frosliel KF, Jahnsen J, Moum BA, et al. Mucosal healing in inflammatory bowel disease: results from a Norwegian population-based cohort. *Gastroenterology* 2007;**133**:412–22.
131. Rutgeerts P, Vermeire S, Van Assche G. Mucosal healing in inflammatory bowel disease: impossible ideal or therapeutic target? *Gut* 2007;**56**:453–5.
132. Rosh JR, Gross T, Mamula P, et al. Hepatosplenic T-cell lymphoma in adolescents and young adults with Crohn's disease: a cautionary tale? *Inflamm Bowel Dis* 2007;**13**:1024–30.
133. Deshpande AR, Abreu MT. Combination therapy with infliximab and immunomodulators: is the glass half empty? *Gastroenterology* 2008;**134**:2161–3.
134. Carter MJ, Lobo AJ, Travis SP. Guidelines for the management of inflammatory bowel disease in adults. *Gut* 2004;**53**(Suppl 5):V1–V16.
135. Zeidan A, Sham R, Shapiro J, et al. Hepatosplenic T-cell lymphoma in a patient with Crohn's disease who received infliximab therapy. *Leuk Lymphoma* 2007;**48**:1410–3.
136. Cucchiara S, Escher JC, Hildebrand H, et al. Pediatric inflammatory bowel diseases and the risk of lymphoma: should we revise our treatment strategies? *J Pediatr Gastroenterol Nutr* 2009;**48**:257–67.
137. Van Assche G, Magdelaine-Beuzelin C, D'Haens G, et al. Withdrawal of immunosuppression in Crohn's disease treated with scheduled infliximab maintenance: a randomized trial. *Gastroenterology* 2008;**134**:1861–8.
138. Baert F, Noman M, Vermeire S, et al. Influence of immunogenicity on the long-term efficacy of infliximab in Crohn's disease. *N Engl J Med* 2003;**348**:601–8.
139. Radstake TR, Svenson M, Eijsbouts AM, et al. Formation of antibodies against infliximab and adalimumab strongly correlates with functional drug levels and clinical responses in rheumatoid arthritis. *Ann Rheum Dis* 2009;**68**:1739–45.
140. Vermeire S, Noman M, Van Assche G, et al. Effectiveness of concomitant immunosuppressive therapy in suppressing the formation of antibodies to infliximab in Crohn's disease. *Gut* 2007;**56**:1226–31.
141. D'Haens G, Baert F, van Assche G, et al. Early combined immunosuppression or conventional management in patients with newly diagnosed Crohn's disease: an open randomised trial. *Lancet* 2008;**371**:660–7.
142. Quinn MA, Conaghan PG, O'Connor PJ, et al. Very early treatment with infliximab in addition to methotrexate in early, poor-prognosis rheumatoid arthritis reduces magnetic resonance imaging evidence of synovitis and damage, with sustained benefit after infliximab withdrawal: results from a twelve-month randomized, double-blind, placebo-controlled trial. *Arthritis Rheum* 2005;**52**:27–35.
143. Breedveld FC, Weisman MH, Kavanaugh AF, et al. The PREMIER study: A multicenter, randomized, double-blind clinical trial of combination therapy with adalimumab plus methotrexate versus methotrexate alone or adalimumab alone in patients with early, aggressive rheumatoid arthritis who had not had previous methotrexate treatment. *Arthritis Rheum* 2006;**54**:26–37.
144. St Clair EW, van der Heijde DM, Smolen JS, et al. Combination of infliximab and methotrexate therapy for early rheumatoid arthritis: a randomized, controlled trial. *Arthritis Rheum* 2004;**50**:3432–43.

145. Durez P, Malghem J, Nzeusseu Toukap A, et al. Treatment of early rheumatoid arthritis: a randomized magnetic resonance imaging study comparing the effects of methotrexate alone, methotrexate in combination with infliximab, and methotrexate in combination with intravenous pulse methylprednisolone. *Arthritis Rheum* 2007;**56**:3919–27.
146. Emery P, Genovese MC, van Vollenhoven R, et al. Less radiographic progression with adalimumab plus methotrexate versus methotrexate monotherapy across the spectrum of clinical response in early rheumatoid arthritis. *J Rheumatol* 2009;**36**:1429–41.
147. Goekoop-Ruiterman YP, de Vries-Bouwstra JK, Allaart CF, et al. Clinical and radiographic outcomes of four different treatment strategies in patients with early rheumatoid arthritis (the BeSt study): a randomized, controlled trial. *Arthritis Rheum* 2005;**52**:3381–90.
148. Emery P, Fleischmann RM, Moreland LW, et al. Golimumab, a human anti-tumor necrosis factor alpha monoclonal antibody, injected subcutaneously every four weeks in methotrexate-naïve patients with active rheumatoid arthritis: twenty-four-week results of a phase III, multicenter, randomized, double-blind, placebo-controlled study of golimumab before methotrexate as first-line therapy for early-onset rheumatoid arthritis. *Arthritis Rheum* 2009;**60**:2272–83.
149. Maini RN, Breedveld FC, Kalden JR, et al. Sustained improvement over two years in physical function, structural damage, and signs and symptoms among patients with rheumatoid arthritis treated with infliximab and methotrexate. *Arthritis Rheum* 2004;**50**:1051–65.
